# Supplementary material for: 3D ITO-nanowire networks as transparent electrode for all-terrain substrate
Source: PubMed Central journal article supplement (PMC6428818; doi:10.1038/s41598-019-41579-2), 2019-03-21
Supplement: 41598_2019_41579_MOESM1_ESM.pdf [file 41598_2019_41579_MOESM1_ESM.pdf]

# **3D ITO-nanowire networks as transparent electrode for all-terrain substrate**

**Qiang Li<sup>1,2,3</sup>, Zhenhuan Tian<sup>2</sup>, Yuantao Zhang<sup>2</sup>, Zuming Wang<sup>2</sup>, Yufeng Li<sup>2</sup>, Wen  
Ding<sup>2</sup>, Tao Wang<sup>3</sup>, and Feng Yun<sup>1,2\*</sup>**

<sup>1</sup>*Key Laboratory of Physical Electronics and Devices for Ministry of Education and Shaanxi Provincial Key Laboratory of Photonics & Information Technology, Xi'an Jiaotong University, Xi'an, Shaanxi, 710049, P. R. China*

<sup>2</sup>*School of Electronic and Information Engineering, Xi'an Jiaotong University, Xi'an, Shaanxi, 710049, P. R. China*

<sup>3</sup>*Department of Electronic and Electrical Engineering, University of Sheffield, Mappin Street, Sheffield, S1 3JD, UK*

## Supplementary 1

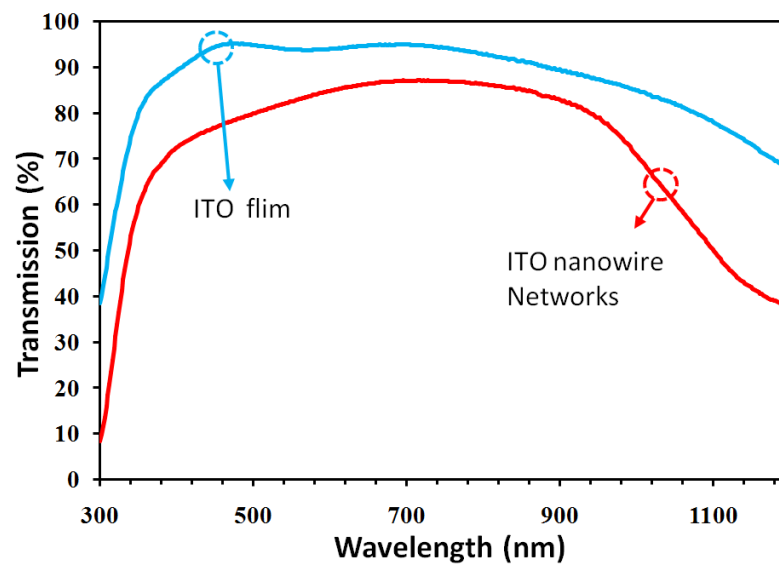

Figure S1|The transmittance of ITO-nanowire networks in the wavelength of 300-1200 nm.

## Supplementary 2

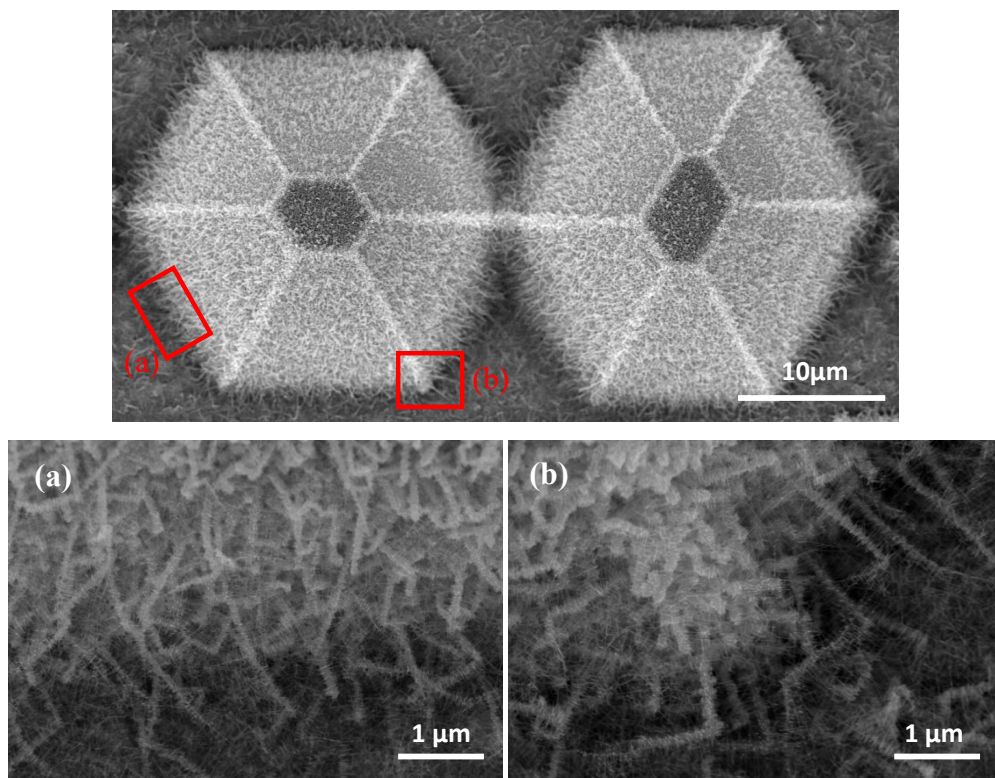

**Figure S2|The 3D ITO nanowire network was grown on the surface of the pyramid array. a,** The connection between the edge of pyramid and the substrate. **b,** The connection between the corner of pyramid and the substrate.

### Supplementary 3

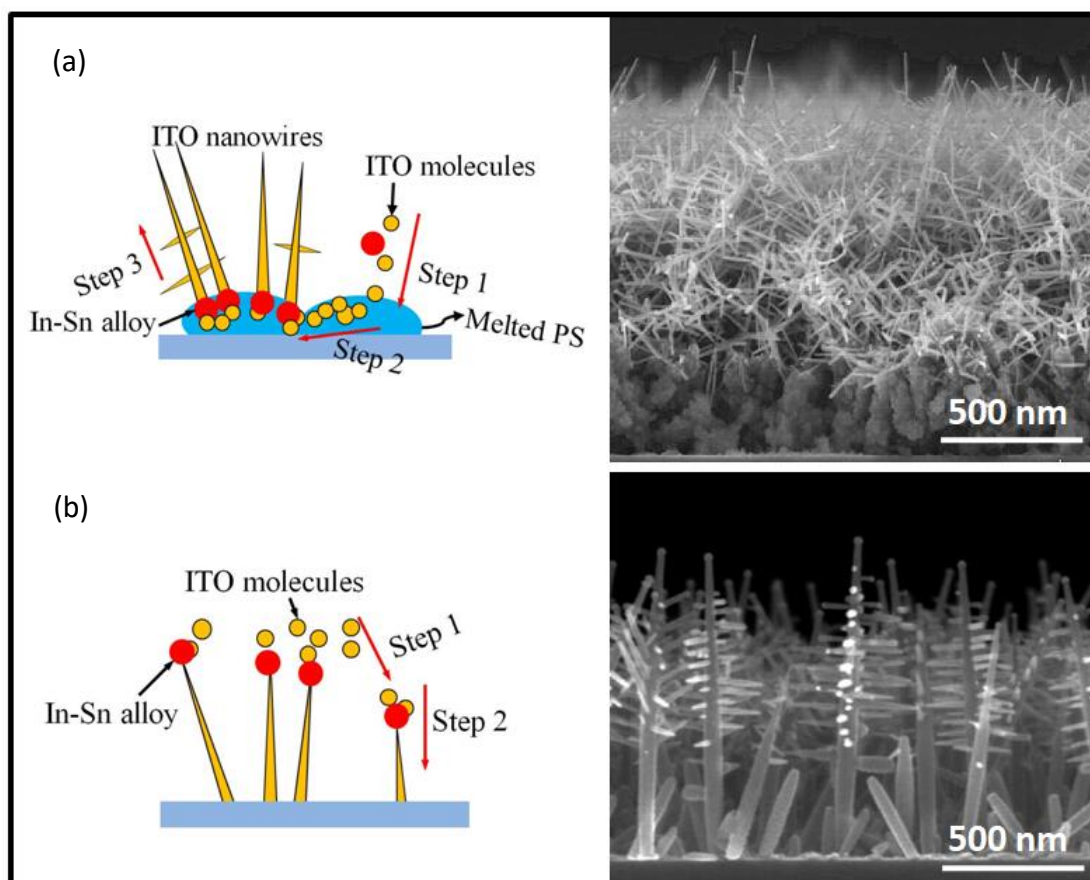

**Figure S3|The growth schematic diagrams and SEM images of ITO nanowires via PS spheres and physical vapour deposition.** **a**, In our method via PS, step 1: ITO molecules were adsorbed by the molten PS; step 2: some molecules were adsorbed directly on the surface of In-Sn alloy; step 3: the ITO nanowires began to grow from bottom to top. From the SEM image, the ITO nanowires are interwoven into a dense network and there are no spherical particles at the top of the nanowires. **b**, In the method of physical vapour deposition, step 1: ITO molecules were adsorbed directly by In-Sn alloy; step 2: the ITO nanowires began to grow from top to bottom. From the SEM image (Nanotechnology 23, 105608, 2012), the top of the nanowires has obvious spherical particles.
